# Supplementary material
Source: PubMed Central journal article supplement (PMC5598470)
Supplement: NIHMS903983-supplement-Web_Appendix.pdf [file NIHMS903983-supplement-Web_Appendix.pdf]

# Web-based Supplementary Materials for “A Bayesian Model for Sparse Functional Data” by W.K. Thompson and O. Rosen

December 3, 2006

## Web Appendix

Here, we give a detailed account of the distributions and sampling scheme outlined in sections 2 and 3. Let  $\mathbf{y} = (\mathbf{y}'_1, \dots, \mathbf{y}'_n)'$  be the vector of responses for all  $n$  subjects. Let  $m = \sum_{i=1}^n m_i$  be the total number of observations across all subjects. With the prior distributions specified in Section 2.2, we have

$$\begin{aligned}
 p(\boldsymbol{\beta}_\gamma, \mathbf{b}_\gamma, \sigma_\epsilon^2, \Sigma_{b,\gamma}, \boldsymbol{\gamma}, \pi \mid \mathbf{y}) &\propto p(\mathbf{y} \mid \mathbf{b}_\gamma, \sigma_\epsilon^2, \boldsymbol{\gamma}) p(\mathbf{b}_\gamma \mid \boldsymbol{\beta}_\gamma, \Sigma_{b,\gamma}, \boldsymbol{\gamma}) p(\boldsymbol{\beta}_\gamma \mid \Sigma_{b,\gamma}, \boldsymbol{\gamma}) \\
 &\quad \times p(\sigma_\epsilon^2) p(\Sigma_{b,\gamma} \mid \boldsymbol{\gamma}) p(\boldsymbol{\gamma} \mid \pi) p(\pi) \\
 &\propto \sigma_\epsilon^{-m} \exp\left\{-\frac{1}{2\sigma_\epsilon^2} \sum_{i=1}^n (\mathbf{y}_i - X_{\gamma,i} \mathbf{b}_{\gamma,i})' (\mathbf{y}_i - X_{\gamma,i} \mathbf{b}_{\gamma,i})\right\} \\
 &\quad \times |\Sigma_{b,\gamma}|^{-n/2} \exp\left\{-\frac{1}{2} \sum_{i=1}^n (\mathbf{b}_{\gamma,i} - \boldsymbol{\beta}_\gamma)' \Sigma_{b,\gamma}^{-1} (\mathbf{b}_{\gamma,i} - \boldsymbol{\beta}_\gamma)\right\} \\
 &\quad \times c^{-q_\gamma/2} \exp\left\{-\frac{1}{2c} \boldsymbol{\beta}'_\gamma \boldsymbol{\beta}_\gamma\right\} (\sigma_\epsilon^2)^{-(c_\epsilon+1)} \exp\{-d_\epsilon/\sigma_\epsilon^2\} \\
 &\quad \times |\Sigma_{b,\gamma}|^{-(\eta_b+q_\gamma+1)/2} \exp\left\{-\frac{\eta_b}{2} \text{trace}(S_\gamma \Sigma_{b,\gamma}^{-1})\right\} \\
 &\quad \times \pi^{q_\gamma} (1-\pi)^{L-q_\gamma} \pi^{c_\pi-1} (1-\pi)^{d_\pi-1}.
 \end{aligned}$$

**Step 1:** Sample  $s$  distinct values  $\mathbf{l} = \{l_1, \dots, l_s\}$  (for predetermined  $1 \leq s \leq L$ ) from  $\{1, \dots, L\}$  without replacement such that each such vector is equally probable.

**Step 2:** Sample  $\{\gamma_l, \boldsymbol{\beta}_\gamma, \mathbf{b}_\gamma\}$  conditional on  $\{\mathbf{l}, \gamma_{(l)}, \sigma_\epsilon^2, \Sigma_{b,\gamma}, \mathbf{y}\}$ . This is done in three sub-

steps, using the factorization

$$\begin{aligned} p(\boldsymbol{\gamma}_l, \boldsymbol{\beta}_\gamma, \mathbf{b}_\gamma \mid \mathbf{l}, \boldsymbol{\gamma}_{(l)}, \sigma_\epsilon^2, \Sigma_{b,\gamma}, \mathbf{y}) &\propto p(\boldsymbol{\gamma}_l \mid \mathbf{l}, \boldsymbol{\gamma}_{(l)}, \sigma_\epsilon^2, \Sigma_{b,\gamma}, \mathbf{y}) p(\boldsymbol{\beta}_\gamma \mid \boldsymbol{\gamma}, \sigma_\epsilon^2, \Sigma_{b,\gamma}, \mathbf{y}) \\ &\times p(\mathbf{b}_\gamma \mid \boldsymbol{\gamma}, \boldsymbol{\beta}_\gamma, \sigma_\epsilon^2, \Sigma_{b,\gamma}, \mathbf{y}). \end{aligned}$$

**Step 2(a):** Draw  $\boldsymbol{\gamma}_l$ ; the posterior conditional probability that  $\boldsymbol{\gamma}_l = \mathbf{u}$  (where  $\mathbf{u}$  ranges over all zero-one vectors of dimension  $s$ ) is given by

$$\begin{aligned} p(\boldsymbol{\gamma}_l = \mathbf{u} \mid \mathbf{l}, \boldsymbol{\gamma}_{(l)}, \sigma_\epsilon^2, \Sigma_{b,\gamma}, \mathbf{y}) &\propto p(\mathbf{y} \mid \mathbf{l}, \boldsymbol{\gamma}_l = \mathbf{u}, \boldsymbol{\gamma}_{(l)}, \sigma_\epsilon^2, \Sigma_{b,\gamma}) \\ &\times p(\boldsymbol{\gamma}_l = \mathbf{u} \mid \mathbf{l}, \boldsymbol{\gamma}_{(l)}, \sigma_\epsilon^2, \Sigma_{b,\gamma}), \end{aligned} \quad (\text{A.1})$$

where

$$\begin{aligned} p(\mathbf{y} \mid \mathbf{l}, \boldsymbol{\gamma}_l = \mathbf{u}, \boldsymbol{\gamma}_{(l)}, \sigma_\epsilon^2, \Sigma_b) &= \int_{\mathbf{b}_\gamma} p(\mathbf{y} \mid \mathbf{l}, \boldsymbol{\gamma}_l = \mathbf{u}, \boldsymbol{\gamma}_{(l)}, \mathbf{b}, \sigma_\epsilon^2, \Sigma_{b,\gamma}) \\ &\times \left\{ \int_{\boldsymbol{\beta}_\gamma} p(\mathbf{b}_\gamma \mid \mathbf{l}, \boldsymbol{\gamma}_l = \mathbf{u}, \boldsymbol{\gamma}_{(l)}, \boldsymbol{\beta}_\gamma, \sigma_\epsilon^2, \Sigma_{b,\gamma}) \right. \\ &\times p(\boldsymbol{\beta}_\gamma \mid \mathbf{l}, \boldsymbol{\gamma}_l = \mathbf{u}, \boldsymbol{\gamma}_{(l)}, \sigma_\epsilon^2, \Sigma_{b,\gamma}) d\boldsymbol{\beta}_\gamma \left. \right\} d\mathbf{b}_\gamma. \end{aligned} \quad (\text{A.2})$$

Let  $q_{\boldsymbol{\gamma}(\mathbf{u})}$  be the dimension of the model selected by  $\boldsymbol{\gamma}(\mathbf{u}) = \{\boldsymbol{\gamma}_l = \mathbf{u}, \boldsymbol{\gamma}_{(l)}\}$ . Denote the right side of (A.2) by  $L_u$ . Then it can be shown that  $L_u$  is equal to

$$\begin{aligned} L_u &= c^{-q_{\boldsymbol{\gamma}(\mathbf{u})}/2} |\Sigma_{b,\boldsymbol{\gamma}(\mathbf{u})}|^{-n/2} |n\Sigma_{b,\boldsymbol{\gamma}(\mathbf{u})}^{-1} + \frac{1}{c} I_{\boldsymbol{\gamma}(\mathbf{u})}|^{-1/2} |A_{\boldsymbol{\gamma}(\mathbf{u})}|^{-1/2} \\ &\times \exp \left\{ \frac{1}{2\sigma_\epsilon^4} \mathbf{y}'(X_{\boldsymbol{\gamma}(\mathbf{u})}^D) A_{\boldsymbol{\gamma}(\mathbf{u})}^{-1} (X_{\boldsymbol{\gamma}(\mathbf{u})}^D)' \mathbf{y} \right\}, \end{aligned} \quad (\text{A.3})$$

where  $\Sigma_{b,\boldsymbol{\gamma}(\mathbf{u})}$  is the  $q_{\boldsymbol{\gamma}(\mathbf{u})} \times q_{\boldsymbol{\gamma}(\mathbf{u})}$  covariance matrix corresponding to the breakpoints selected by  $\boldsymbol{\gamma}(\mathbf{u})$ ,  $X_{\boldsymbol{\gamma}(\mathbf{u})}^D = \text{diag}\{X_{\boldsymbol{\gamma}(\mathbf{u}),i}\}$  is an  $m \times nq_{\boldsymbol{\gamma}(\mathbf{u})}$  block-diagonal matrix and

$$\begin{aligned} A_{\boldsymbol{\gamma}(\mathbf{u})} &= \text{diag} \left( \frac{1}{\sigma_\epsilon^2} X_{\boldsymbol{\gamma}(\mathbf{u}),i}' X_{\boldsymbol{\gamma}(\mathbf{u}),i} + \Sigma_{b,\boldsymbol{\gamma}(\mathbf{u})}^{-1} \right) - \\ &(\mathbf{1} \otimes I_{q_{\boldsymbol{\gamma}(\mathbf{u})}}) \left( \Sigma_{b,\boldsymbol{\gamma}(\mathbf{u})}^{-1} \left( n\Sigma_{b,\boldsymbol{\gamma}(\mathbf{u})}^{-1} + \frac{1}{c} I_{q_{\boldsymbol{\gamma}(\mathbf{u})}} \right)^{-1} \Sigma_{b,\boldsymbol{\gamma}(\mathbf{u})}^{-1} \right) (\mathbf{1} \otimes I_{q_{\boldsymbol{\gamma}(\mathbf{u})}})', \end{aligned}$$

where  $\mathbf{1}$  is the  $n$ -dimensional vector of all ones,  $I_{q_{\gamma(u)}}$  is the  $q_{\gamma(u)} \times q_{\gamma(u)}$  identity matrix, and  $\otimes$  denotes the Kronecker product. While calculation of  $L_u$  involves taking the inverse and determinant of the  $nq_{\gamma(u)} \times nq_{\gamma(u)}$  matrix  $A_{\gamma(u)}$ , because of the special form of this matrix, these can be simplified through the use of Woodbury's formula (Lange, 1999, pp. 86-87), so that only the determinant and inverse of  $q_{\gamma(u)} \times q_{\gamma(u)}$  matrices are necessary.

Let  $\Theta_u = p(\gamma_l = \mathbf{u} \mid \mathbf{l}, \gamma_{(b,l)}, \sigma_\epsilon^2, \Sigma_{b,\gamma})$ . Then

$$\begin{aligned} \Theta_u &= \int_{\pi} p(\gamma_l = \mathbf{u} \mid \mathbf{l}, \gamma_{(l)}, \sigma_\epsilon^2, \Sigma_{b,\gamma}, \pi) p(\pi) d\pi \\ &= B(c_\pi + q_{\gamma(u)}, d_\pi + L - q_{\gamma(u)}) / B(c_\pi + q_{\gamma(0)}, d_\pi + L - s - q_{\gamma(0)}), \end{aligned} \quad (\text{A.4})$$

where  $B(\cdot, \cdot)$  is the beta function,  $L$  is the number of interior breakpoints, and  $q_{\gamma(0)}$  is the dimension of the model selected by  $\gamma(\mathbf{0}) = \{\gamma_l = \mathbf{0}, \gamma_{(l)}\}$ . Using  $L_u$  and  $\Theta_u$  as defined in (A.3) and (A.4), we have that (A.1) is

$$p(\gamma_l = \mathbf{u} \mid \mathbf{l}, \gamma_{(l)}, \sigma_\epsilon^2, \Sigma_{b,\gamma}, \mathbf{y}) = \frac{\Theta_u L_u}{\sum_{u'} \Theta_{u'} L_{u'}},$$

where the sum in the denominator of the right side is taken over all zero-one vectors of dimension  $s$ .

**Step 2(b):** Draw  $\beta_\gamma$  conditional on  $\{\gamma, \sigma_\epsilon^2, \Sigma_{b,\gamma}, \mathbf{y}\}$ . The posterior conditional is

$$\begin{aligned} p(\beta_\gamma \mid \gamma, \sigma_\epsilon^2, \Sigma_{b,\gamma}, \mathbf{y}) &\propto \int_{\mathbf{b}_\gamma} \{p(\mathbf{y} \mid \mathbf{b}_\gamma, \beta_\gamma, \gamma, \sigma_\epsilon^2, \Sigma_{b,\gamma}) p(\mathbf{b}_\gamma \mid \beta_\gamma, \gamma, \sigma_\epsilon^2, \Sigma_{b,\gamma})\} d\mathbf{b}_\gamma \\ &\times p(\beta_\gamma \mid \gamma, \sigma_\epsilon^2, \Sigma_{b,\gamma}). \end{aligned}$$

After integration, we see that  $\beta_\gamma \mid \{\gamma, \sigma_\epsilon^2, \Sigma_b, \mathbf{y}\} \sim \text{MVN}(\boldsymbol{\mu}_{\beta_\gamma}, \Sigma_{\beta_\gamma})$ , where

$$\begin{aligned} \boldsymbol{\mu}_{\beta_\gamma} &= \Sigma_{\beta_\gamma} \sum_{i=1}^n \Sigma_{b,\gamma}^{-1} \left( \frac{1}{\sigma_\epsilon^2} X'_{\gamma,i} X_{\gamma,i} + \Sigma_{b,\gamma}^{-1} \right)^{-1} \frac{1}{\sigma_\epsilon^2} X'_{\gamma,i} \mathbf{y}_i \quad \text{and} \\ \Sigma_{\beta_\gamma} &= \left\{ n \Sigma_{b,\gamma}^{-1} + \frac{1}{c} I_\gamma - \sum_{i=1}^n \Sigma_{b,\gamma}^{-1} \left( \frac{1}{\sigma_\epsilon^2} X'_{\gamma,i} X_{\gamma,i} + \Sigma_{b,\gamma}^{-1} \right)^{-1} \Sigma_{b,\gamma}^{-1} \right\}^{-1}. \end{aligned} \quad (\text{A.5})$$

**Step 2(c):** Draw the  $\{\mathbf{b}_{\gamma,i}\}_{i=1}^n$  conditional on  $\{\boldsymbol{\gamma}, \boldsymbol{\beta}_\gamma, \sigma_\epsilon^2, \Sigma_{b,\gamma}, \mathbf{y}\}$ . The conditional posterior distributions of the  $\{\mathbf{b}_{\gamma,i}\}_{i=1}^n$  are independent  $\text{MVN}(\boldsymbol{\mu}_{b_{i|\cdot}}, \Sigma_{b_{i|\cdot}})$ , where

$$\begin{aligned}\boldsymbol{\mu}_{b_{i|\cdot}} &= \Sigma_{b_{i|\cdot}} \left( \frac{1}{\sigma_\epsilon^2} X'_{\gamma,i} \mathbf{y}_i + \Sigma_{b,\gamma}^{-1} \boldsymbol{\beta}_\gamma \right) \quad \text{and} \\ \Sigma_{b_{i|\cdot}} &= \left( \frac{1}{\sigma_\epsilon^2} X'_{\gamma,i} X_{\gamma,i} + \Sigma_{b,\gamma}^{-1} \right)^{-1}.\end{aligned}\tag{A.6}$$

**Step 3:** Draw  $\sigma_\epsilon^2$  conditional on  $\{\boldsymbol{\gamma}, \boldsymbol{\beta}_\gamma, \mathbf{b}_\gamma, \Sigma_{b,\gamma}, \mathbf{y}\}$ . The posterior conditional of  $\sigma_\epsilon^2$  is inverse gamma,  $\text{IG}(c_{\epsilon|\cdot}, d_{\epsilon|\cdot})$ , with

$$\begin{aligned}c_{\epsilon|\cdot} &= c_\epsilon + \frac{m}{2}, \quad \text{and} \\ d_{\epsilon|\cdot} &= d_\epsilon + \frac{1}{2} \sum_{I=1}^n (\mathbf{y}_i - X_{\gamma,i} \mathbf{b}_{\gamma,i})' (\mathbf{y}_i - X_{\gamma,i} \mathbf{b}_{\gamma,i}).\end{aligned}\tag{A.7}$$

The parameters  $c_\epsilon$  and  $d_\epsilon$  may be chosen to obtain a vague prior on  $\sigma_\epsilon^2$ .

**Step 4:** Draw  $\Sigma_{b,\gamma}$  conditional on  $\{\boldsymbol{\gamma}, \boldsymbol{\beta}_\gamma, \mathbf{b}_\gamma, \sigma_\epsilon^2, \mathbf{y}\}$ . The posterior conditional distribution of  $\Sigma_{b,\gamma}$  is inverse Wishart,  $\text{IW}(\eta_{b|\cdot}, S_{b|\cdot}, \eta_{b|\cdot})$ , where

$$\begin{aligned}\eta_{b|\cdot} &= \eta_b + n, \quad \text{and} \\ S_{b|\cdot} &= \frac{1}{\eta_{b|\cdot}} \left( \eta_b S_\gamma + \sum_{i=1}^n (\mathbf{b}_{\gamma,i} - \boldsymbol{\beta}_\gamma) (\mathbf{b}_{\gamma,i} - \boldsymbol{\beta}_\gamma)' \right).\end{aligned}\tag{A.8}$$

Let  $\mathbf{t}$  be an ordered vector of  $\tau$  time values containing all the unique time points in the data. Let  $X_\tau$  denote the  $\tau \times K$  design matrix of B-splines evaluated at all the points of  $\mathbf{t}$  and let  $X_{\tau,\boldsymbol{\gamma}}$  be the  $\tau \times q_\gamma$  design matrix corresponding to the breakpoints selected in  $\boldsymbol{\gamma}$ . Furthermore, define  $\Phi_\gamma = (X'_\tau X_\tau)^{-1} X'_\tau X_{\tau,\boldsymbol{\gamma}}$ . Since models created by removing breakpoints are linear subspaces of the full model, we have that  $X_\tau \Phi_\gamma = X_{\tau,\boldsymbol{\gamma}}$  and hence we also have  $X_{\tau,\boldsymbol{\gamma}} \boldsymbol{\beta}_\gamma = X_\tau \Phi_\gamma \boldsymbol{\beta}_\gamma$ . Thus, going from the full model to the model given by  $\boldsymbol{\gamma}$  implies the linear restrictions on  $\boldsymbol{\beta}$  (and similarly for the  $\mathbf{b}_i$ 's) given by  $\boldsymbol{\beta} = \Phi_\gamma \boldsymbol{\beta}_\gamma$  and hence

$\boldsymbol{\beta}_\gamma = (\Phi'_\gamma \Phi_\gamma)^{-1} \Phi'_\gamma \boldsymbol{\beta} = \Omega'_\gamma \boldsymbol{\beta}$ , where  $\Omega_\gamma = \Phi_\gamma (\Phi'_\gamma \Phi_\gamma)^{-1}$ . This implies that the covariance matrix  $\Sigma_{b,\gamma}$  can be obtained from  $\Sigma_b$  by using the relationship  $\Sigma_{b,\gamma} = \Omega'_\gamma \Sigma_b \Omega_\gamma$ . Additionally, let  $P_{\Omega_\gamma} = \Omega_\gamma (\Omega'_\gamma \Omega_\gamma)^{-1} \Omega'_\gamma$ . Then,

$$\begin{aligned} \Sigma_b &= P_{\Omega_\gamma} \Sigma_b P_{\Omega_\gamma} + (I - P_{\Omega_\gamma}) \Sigma_b (I - P_{\Omega_\gamma}) \\ &= \Omega_\gamma (\Omega'_\gamma \Omega_\gamma)^{-1} \Sigma_{b,\gamma} (\Omega'_\gamma \Omega_\gamma)^{-1} \Omega'_\gamma + (I - P_{\Omega_\gamma}) \Sigma_b (I - P_{\Omega_\gamma}). \end{aligned} \quad (\text{A.9})$$

At iteration  $r+1$  of the MCMC algorithm, let  $\Sigma_b^{(r)}$  be the value of  $\Sigma_b$  generated in the previous iteration. Step 4 consists of drawing  $\Sigma_{b,\gamma}^{(r+1)}$  according to the  $\text{IW}(S_{b|\cdot}, \eta_{b|\cdot})$  as detailed above and then using (A.9), with  $\Sigma_{b,\gamma}^{(r+1)}$  in place of  $\Sigma_{b,\gamma}$  and  $\Sigma_b^{(r)}$  in place of  $\Sigma_b$  on the right side of this equation to obtain the new draw of the full covariance matrix  $\Sigma_b^{(r+1)}$ .
